# Supplementary material
Source: PubMed Central journal article supplement (PMC3593102)
Supplement: NIHMS354666-supplement-Supplementary_File.pdf [file NIHMS354666-supplement-Supplementary_File.pdf]

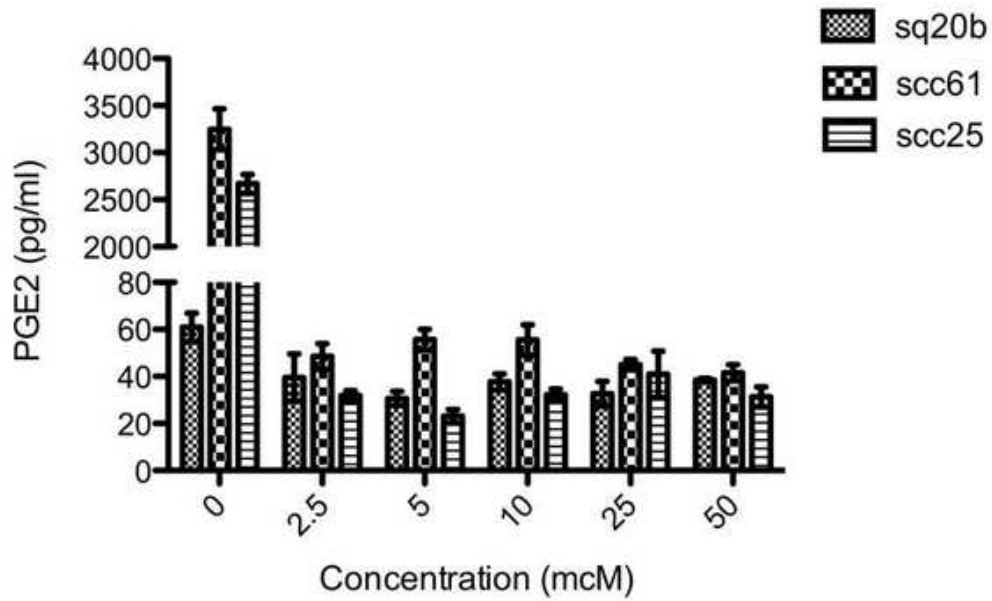

**Supplemental Figure 1:** Effects of celecoxib on intracellular PGE-2 concentration levels in SQ-20B, SCC25 and SCC 61 cells as measured by ELISA. This assay was performed in triplicate and levels shown reflect mean  $\pm$  standard error.

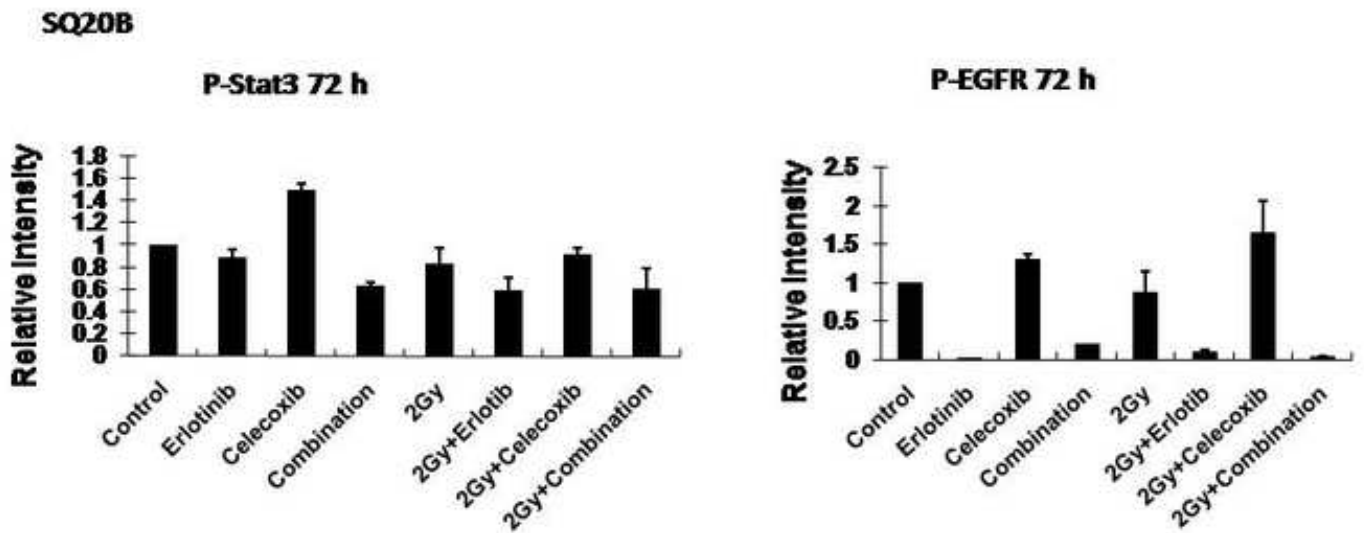

**Supplemental Figure 2:** Effect of single and combination treatment on p-STAT3 and pEGFR protein levels in SQ20B cells assessed by immunoblotting. We measured protein levels at 72 hours after treatment by densitometry.

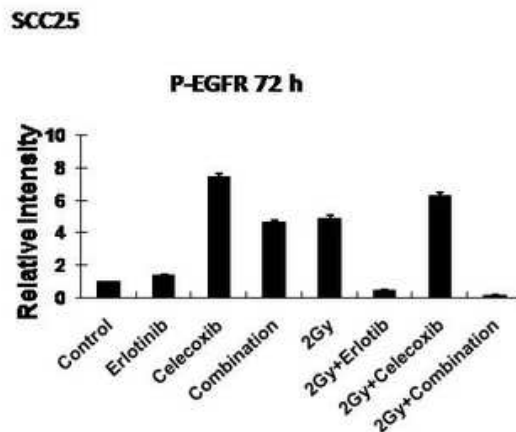

**Supplemental Figure 3:** Effect of single and combination treatment on pEGFR protein levels in SCC25 cells assessed by immunoblotting. We analyzed protein levels at 72 hours after treatment by densitometry.

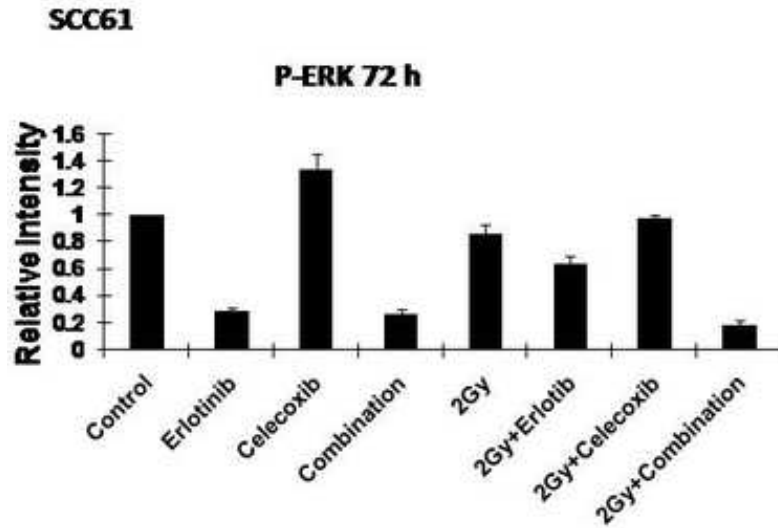

**Supplemental Figure 4:** Effect of single and combination treatment on p-ERK protein levels in SCC61 cells as assessed by immunoblotting. We measured protein levels at 72 hours after treatment by densitometry.

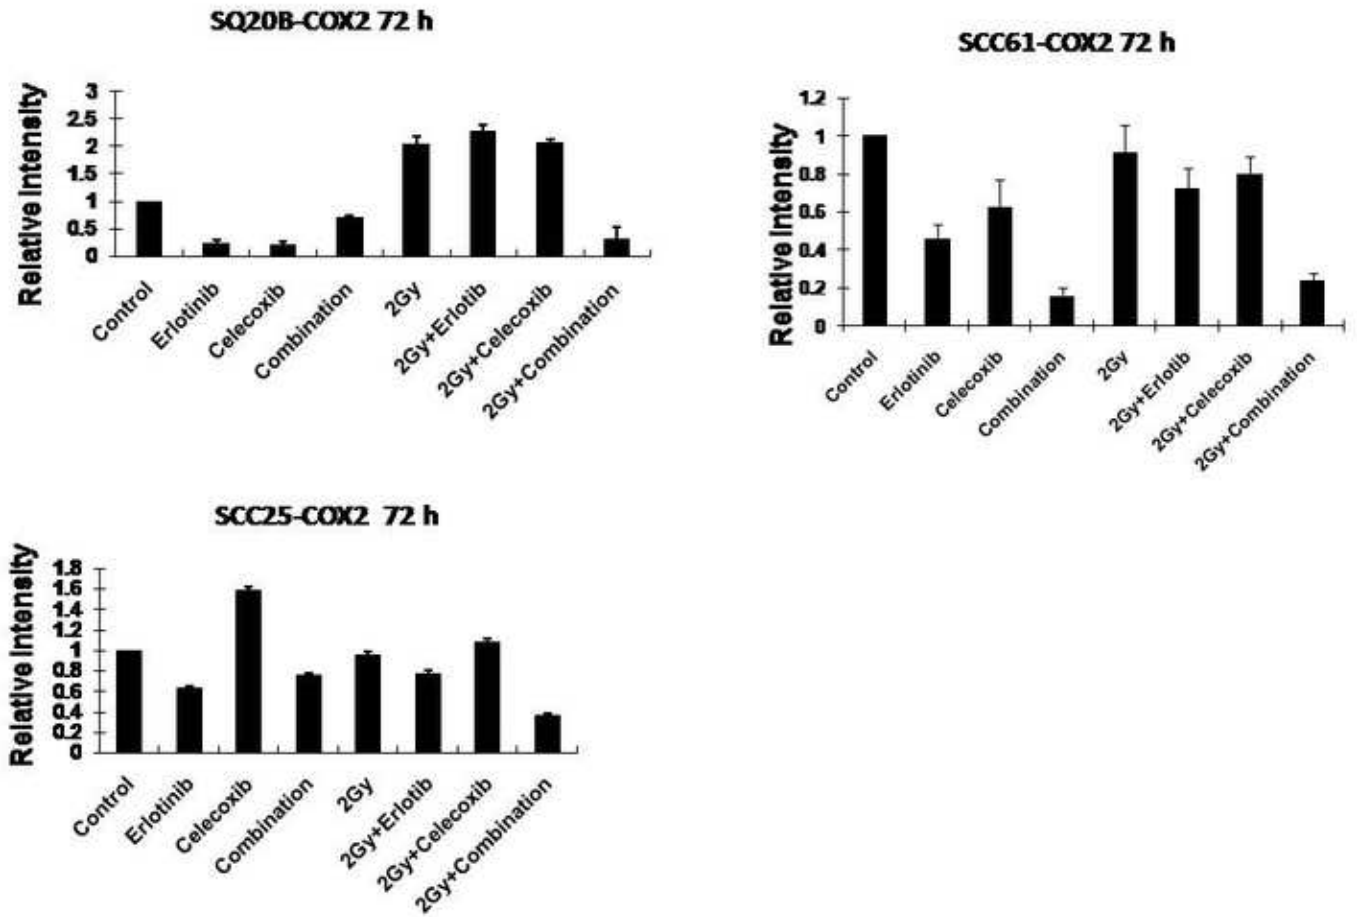

**Supplemental Figure 5:** Effect of single and combination treatment on COX-2 protein levels in SQ20B, SCC25 and SCC61 cells as assessed by immunoblotting. We assessed protein levels at 72 hours after treatment by densitometry.
